# Supplementary material for: Influence of asymmetric substituent group 2-methyl-1,3-propanediol on bio-based poly(propylene furandicarboxylate) copolyesters
Source: Royal Society of Chemistry journal article supplement (doi:10.1039/c9sm02081k), 2019-11-19
Supplement: c9sm02081k1.pdf [file c9sm02081k1.pdf]

## 1 Supporting Information

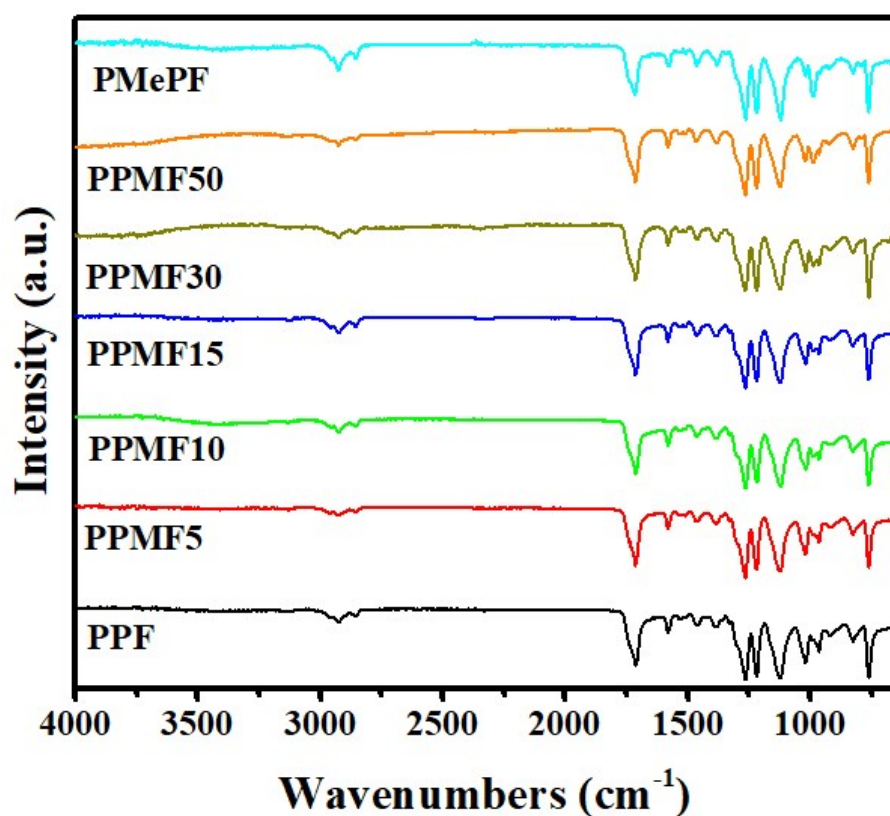

2

3 **Fig. S1** FT-IR spectra of PPF, PPMFs, and PMePF copolyesters.

4 Fig. S1 represents the FT-IR spectra of copolyesters indicated the formation of the ester bond in  
5 all grades case. The characteristic band peaks of the furan ring, such as C=C, appeared around 1580  
6 and 1520  $\text{cm}^{-1}$ , bending motions peak appeared around 970, 830, and 770  $\text{cm}^{-1}$ . Besides, the strong  
7 absorption around 1735  $\text{cm}^{-1}$  was attributed to the C=O of the ester group. The bond peaks around  
8 1020  $\text{cm}^{-1}$  turned into weakly, and the bond peaks around 990  $\text{cm}^{-1}$  became strong obviously as the  
9 co-monomers content increasing, suggesting the  $-\text{CH}_2\text{CH}_2\text{CH}_2-$  hydrogen atom was replaced with -  
10  $\text{CH}_2\text{CH}(\text{CH}_3)\text{CH}_2-$  methyl group.

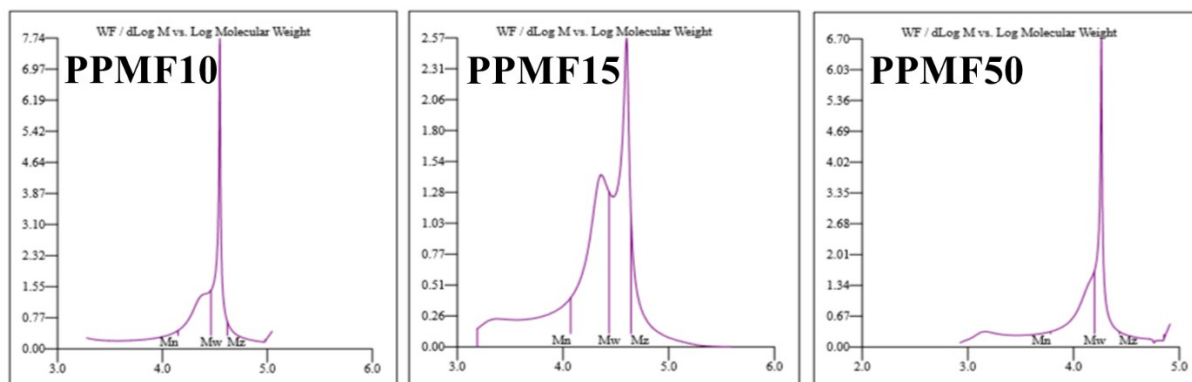

11

12 **Fig. S2** GPC spectra of PPMF10, PPMF15, PPMF50.

13
